1 **Comprehensive Identification of Fim-Mediated Inversions in Uropathogenic *Escherichia***  
2 ***coli* with Structural Variation Detection Using Relative Entropy**

3

4 Colin W. Russell,<sup>a</sup> Rashmi Sukumaran,<sup>a\*</sup> Lu Ting Liow,<sup>a\*</sup> Balamurugan Periaswamy,<sup>a,c</sup>

5 Shazmina Rafee,<sup>a</sup> Yuemin C. Chee,<sup>a\*</sup> Swaine L. Chen<sup>a,b,#</sup>

6

7 <sup>a</sup>Department of Medicine, Yong Loo Lin School of Medicine, National University of Singapore,  
8 Singapore

9 <sup>b</sup>Infectious Disease Group, Genome Institute of Singapore, Singapore

10 <sup>c</sup>GERMS platform, Genome Institute of Singapore, Singapore

11

12 Running head: Structural Variations in Uropathogenic *E. coli*

13

14 #Address correspondence to Swaine L. Chen, [slchen@gis.a-star.edu.sg](mailto:slchen@gis.a-star.edu.sg).

15 \*Present address: Rashmi Sukumaran, University of Kerala, Kerala, India; Lu Ting Liow,

16 National University of Singapore, Singapore; Yuemin C. Chee, Duke-NUS Medical School,

17 Singapore.

18 C.W.R. and R.S. contributed equally to this work.

19

20 Abstract word count: 395

21 Text word count: 5300

22

## 23 **Abstract**

24 Most urinary tract infections (UTIs) are caused by uropathogenic *Escherichia coli* (UPEC),  
25 which depend on an extracellular organelle (Type 1 pili) for adherence to bladder cells during  
26 infection. Type 1 pilus expression is partially regulated by inversion of a piece of DNA referred  
27 to as *fimS*, which contains the promoter for the *fim* operon encoding Type 1 pili. *fimS* inversion is  
28 regulated by up to five recombinases collectively known as Fim recombinases. These Fim  
29 recombinases are currently known to regulate two other switches: the *ipuS* and *hyxS* switches. A  
30 long-standing question has been whether the Fim recombinases regulate the inversion of other  
31 switches, perhaps to coordinate expression for adhesion or virulence. We answered this question  
32 using whole genome sequencing with a newly developed algorithm (Structural Variation  
33 detection using Relative Entropy, SVRE) for calling structural variations using paired-end short  
34 read sequencing. SVRE identified all of the previously known switches, refining the specificity  
35 of which recombinases act at which switches. Strikingly, we found no new inversions that were  
36 mediated by the Fim recombinases. We conclude that the Fim recombinases are each highly  
37 specific for a small number of switches. We hypothesize that the unlinked Fim recombinases  
38 have been recruited to regulate *fimS*, and *fimS* only, as a secondary locus; this further implies that  
39 regulation of Type 1 pilus expression (and its role in gastrointestinal and/or genitourinary  
40 colonization) is important enough, on its own, to influence the evolution and maintenance of  
41 multiple additional genes within the accessory genome of *E. coli*.

42

## 43 **Importance**

44 UTIs are a common ailment that affects more than half of all women during their lifetime. The  
45 leading cause of UTIs is UPEC, which rely on Type 1 pili to colonize and persist within the

46 bladder during infection. The regulation of Type 1 pili is remarkable for an epigenetic  
47 mechanism in which a section of DNA containing a promoter is inverted. The inversion  
48 mechanism relies on what are thought to be dedicated recombinase genes; however, the full  
49 repertoire for these recombinases is not known. We show here that there are no additional targets  
50 beyond those already identified for the recombinases in the entire genome of two UPEC strains,  
51 arguing that Type 1 pilus expression itself is the driving evolutionary force for the presence of  
52 these recombinase genes. This further suggests that targeting the Type 1 pilus is a rational  
53 alternative non-antibiotic strategy for the treatment of UTI.

## 54 55 **Introduction**

56 Uropathogenic *Escherichia coli* (UPEC) are the primary cause of urinary tract infections  
57 (UTIs) (1, 2), which are estimated to affect more than half of all women during their lifetime (3).  
58 The total annual cost of community-acquired and nosocomial UTIs in the United States was  
59 estimated to be \$2 billion in 1995 (3). Although UTIs have traditionally been effectively treated  
60 with antibiotics, in some patients UTIs recur despite apparently appropriate antibiotic therapy  
61 and sterilization of the urine (4). Furthermore, UTIs are the first or second most common  
62 indication for antibiotic therapy (5, 6), making them a major contributor to rising antibiotic  
63 resistance rates (7). Therefore, substantial effort has been devoted to studying the molecular  
64 mechanisms by which UPEC cause UTI in the service of developing alternative preventive and  
65 therapeutic strategies (2, 8-11).

66 One of the major successes in UTI research has been the recognition of the importance of  
67 Type 1 pili for causing UTI (12-14). Type 1 pili, encoded by the *fim* operon, are hair-like,  
68 multiprotein structures that extend from the outer membrane and terminate in the adhesin protein  
69 FimH (15-17). FimH binds to mannose residues on glycosylated bladder surface proteins such as

70 uroplakin protein UPIa (18) and  $\alpha 3\beta 1$  integrin heterodimers (19). Adhesion to the bladder  
71 epithelium can lead to internalization of the bacteria into host cells and formation of intracellular  
72 bacterial communities (IBCs) (20-23). Bacteria in IBCs are protected from the immune response  
73 and antibiotic treatment, and can later escape from the host cells to cause recurrent infection (24,  
74 25). Therefore, Type 1 pili directly contribute both to the initiation of infection and to  
75 intracellular persistence. Several new strategies have focused on blocking the function of Type 1  
76 pili by small molecule inhibition or vaccination (26, 27).

77         The pilus structural proteins (including the FimH adhesin) and the chaperone-usher  
78 proteins that mediate pilus biogenesis are encoded within the *fimAICDFGH* operon (15, 16).  
79 Regulation of Type 1 pili expression centers on the epigenetic alteration of the *fim* operon  
80 promoter, which is located within the invertible *fim* switch *fimS* (28, 29). When *fimS* is in the ON  
81 orientation, the promoter is positioned to transcribe the *fim* genes and Type 1 pili may be  
82 synthesized. In contrast, when the *fimS* promoter is in the OFF orientation, bacteria do not  
83 produce Type 1 pili.

84         Switching of *fimS* from one state to another is regulated by recombinases which bind to  
85 inverted repeat (IR) sequences that flank the switch. Two recombinases, FimB and FimE, are  
86 encoded by genes that are genetically linked to the *fim* operon and *fimS* switch (30). Other  
87 known recombinases acting at *fimS* include the genetically unlinked IpuA and FimX (30-32).  
88 Interestingly, both the linked and unlinked Fim recombinases are also able to mediate the  
89 inversion of other switches. The *hyxS* switch is inverted by FimX (33), while *ipuS* was shown to  
90 be inverted by FimE, FimX, IpuA, and IpuB (but not FimB) (34). Like *fimS*, inversion of *hyxS*  
91 and *ipuS* appears to regulate downstream gene expression, but the full importance of these genes  
92 in pathogenesis is still not clear.

93           An open question in the field has been whether the Fim recombinases are utilized in the  
94 regulation of other, still unknown, switches, and whether such switches may be related to  
95 pathogenesis. To search for novel invertible elements, we developed an algorithm named  
96 Structural Variation detection using Relative Entropy (SVRE) to detect genomic structural  
97 variations (SVs) in whole genome sequencing data. We applied SVRE to uropathogenic strains  
98 overexpressing each Fim recombinase. In addition to the known inversions at *fimS*, *hyxS*, and  
99 *ipuS*, SVRE detected several SVs that were recombinase-independent. Importantly, no new  
100 invertible switches were found, indicating that *fimS* is inverted by several recombinases that  
101 regulate little else, suggesting that tuning of Type 1 pilus expression is of strong evolutionary  
102 importance.

103

## 104 **Results**

### 105 *Development of SVRE*

106           Invertible sequences like *fimS* are one class of SV, which also includes deletions,  
107 duplications, translocations, and more complex rearrangements. Several programs have been  
108 developed to call SVs from whole genome sequencing data. One primary strategy for SV  
109 detection is to identify paired-end reads with unusual mapping patterns. Generation of DNA  
110 libraries for next-generation sequencing typically includes a size selection step that restricts the  
111 physical size of the DNA fragments that are carried forward for sequencing. When mapped to an  
112 ideal reference genome, the distance between paired-end reads should reflect this length.  
113 Additionally, the reads should map to opposite strands of the genome. Paired-end reads with an  
114 appropriate mapping distance and read orientation are termed “concordant” reads. In contrast, in  
115 the presence of an SV in the input DNA relative to the reference genome, paired-end reads

116 associated with the SV map at a distance or orientation that differs from this expectation; these  
117 reads are called “discordant” reads.

118         We developed SVRE, an algorithm that detects SVs by analyzing the distribution of  
119 mapping distances in segments of the genome. When reads span an SV, the local mapping  
120 distances for these reads should follow a different distribution based on the type of SV; the  
121 difference in distribution is generated by discordant reads. In the case of an invertible element  
122 like *fimS*, the genomic material used for sequencing may contain a mixture of both orientations  
123 (Figure 1A). Reads derived from the invertible element will map to the reference genome  
124 differently depending on the orientation of the element. If the orientation is the same as the  
125 reference, the reads will align with the expected mapping distance to opposite strands (the gray  
126 arrows in Figure 1A). However, if the orientation is reversed, the paired-end reads will map to  
127 the same strand and with a mapping distance different from that selected during library  
128 preparation (the orange arrows in Figure 1A). When paired-end reads map to the same strand,  
129 SVRE assigns them a negative mapping distance. Therefore, a hallmark of inversions is a local  
130 mapping distribution that skews towards negative values.

131         SVRE compares the local mapping distribution of each genome segment to the global  
132 distribution, which includes the mapping distances of all paired-end reads genome-wide. The  
133 comparison of local and global mapping distributions is made using relative entropy, a statistical  
134 test derived from information theory (35). By using relative entropy, SVRE improves on existing  
135 SV detection software by providing a more general theoretical foundation for detecting  
136 anomalous insert length distributions (as opposed to assuming a normal distribution), resulting in  
137 improved signal-to-noise ratio and accuracy. Full theoretical and algorithmic details for SVRE  
138 can be found in the Methods and Supplemental Information.

139

140 *Application of SVRE to discover SVs in UTI89*

141 SVRE was applied to the uropathogenic strain UTI89 carrying a pBAD33-based plasmid  
142 providing arabinose-inducible overexpression of *fimB* or *fimX*, both of which bias the *fimS*  
143 switch towards the ON orientation (a similar strategy to that used in (33)). In contrast, the UTI89  
144 reference genome has the *fimS* switch in the OFF orientation; therefore, induction of *fimB* or  
145 *fimX* should result in a structural variation (inversion) at *fimS* relative to the published reference  
146 sequence. Indeed, with overexpression of either recombinase, windows associated with the *fim*  
147 switch showed a local mapping distance distribution that differed from the global distribution  
148 (Figure 1B). The difference in the distributions can be primarily attributed to the negative  
149 mapping distances observed around the *fim* switch due to paired reads mapping to the same  
150 strand, indicative of an inversion. The distribution in flanking windows not associated with *fimS*  
151 was similar to the global distribution and these windows were not predicted by SVRE to contain  
152 an SV (Figure 1B).

153 The SVRE algorithm assigns a Relative Information Criterion (RIC) score (i.e. relative  
154 entropy) to each window. The RIC score peaks for the *fimS*-associated windows were distinct  
155 and well above the genomic background (Figure 2A-B). In addition to the *fimS* peak, there was a  
156 distinct peak at *hyxS* in the FimX sample but not the FimB sample. The detection of the *fimS* and  
157 *hyxS* peaks with recombinase overexpression demonstrated the ability of SVRE to find known  
158 SVs.

159 In addition to the *fim* and *hyx* switches, other genomic locations exhibited distinct peaks  
160 in RIC scores. Both samples shared a RIC score peak that corresponded to the *ara* locus (labeled  
161 “ara” in Figures 2A and B), which is an artefact originating from the use of pBAD plasmids. The

162 remaining peaks included two cases of inversions occurring within prophage (labeled “phg inv”  
163 in Figures 2A and B), as well as one inversion occurring in an area containing three asparagine  
164 tRNA genes (labeled “asn” in Figures 2A and B). These inversions were predicted to occur in  
165 both the FimB and FimX samples. Both samples also shared a prediction of prophage duplication  
166 (labeled “dup”), with 2 additional cases of duplication and deletion of prophage (labeled  
167 “dup/del”) found only in the FimX sample. Using PCR, each of these SVs was validated in the  
168 *fimB* and *fimX* overexpressing strains, but were also found to occur in control cells not  
169 overexpressing any recombinases (Figure S1), indicating that these SVs do not appear to be  
170 regulated by Fim recombinases. In addition, one of the prophage-associated inversions occurred  
171 in the vicinity of a predicted prophage-encoded invertase that is homologous to other phage  
172 systems that have been shown to regulate linked prophage promoters (36). The lack of novel  
173 invertible elements regulated by FimB and FimX confirms that these recombinases are specific  
174 to *fimS* (FimB and FimX) and *hyxS* (FimX).

175

#### 176 *Discovery and validation of structural variations in CFT073*

177 The pyelonephritis isolate CFT073 encodes two recombinases (IpuA and IpuB) and one  
178 known invertible switch (*ipuS*) that are not found in UTI89 (31). Although IpuB was not able to  
179 regulate *fimS*, IpuA was shown to be capable of regulating the *fim* switch both *in vitro* and *in*  
180 *vivo*, adding another layer to Type 1 pili regulation (31). The *ipuS* switch is located between *ipuA*  
181 and *ipuR*, and was shown to be inverted by IpuA, IpuB, FimX, and FimE, but not FimB (34).

182 The CFT073 allele for each of these recombinases (in cases where they differed from  
183 UTI89) was cloned into pBAD33. CFT073 cells carrying each of these plasmids were sequenced  
184 and analyzed with SVRE (Figure 3). As expected, a peak for *hyxS* was detected for



185 CFT073/pBAD-fimX cells (Figure 3F), but not for any of the other samples. Distinct peaks for  
186 *fimS* were observed for the FimB, FimE, IpuB, and FimX samples (Figure 3B, C, E, F). There  
187 were distinct *ipuS* peaks with expression of any of the recombinases (Figure 3B-F). Similar to  
188 the UTI89 samples, other peaks were observed that were unrelated to Fim recombinase activity,  
189 some of which were present in the empty vector sample (Figure 3A). These included the *ara*  
190 operon artefact (“ara” in Figure 3), a false-positive peak associated with mismapping to  
191 ambiguous bases in *rrnD* (“rib”), and phage deletions and duplications (“phg”). The phage SVs  
192 were found to occur regardless of Fim recombinase expression (Figure S2). Again, as in UTI89,  
193 there was no detection of novel invertible elements regulated by the Fim recombinases.

194

#### 195 *Effects of recombinase overexpression on ipuS inversion and expression of neighboring genes*

196 We observed an *ipuS* peak in the pBAD-fimB sample (Figure 3B) despite previous data  
197 suggesting that FimB is not able to invert *ipuS* (34). To investigate this further, *ipuS* in the ON  
198 and OFF orientation was cloned onto a pUC19 backbone. The plasmid sequences confirmed the  
199 seven-nucleotide IRs that were observed previously (Figure 4A) (34). Each recombinase was  
200 expressed in the MDS42 strain background (chosen due to its lack of endogenous recombinases)  
201 in the presence of the *ipuS*-OFF or *ipuS*-ON plasmids (Figure 4B). FimB was capable of  
202 inverting *ipuS*, but it had the lowest efficiency of all the recombinases (Figure 4B). The ability of  
203 FimB to invert *ipuS* was confirmed in CFT073 (Figure 4C). Overall, IpuB and FimE exhibited  
204 the greatest efficiency in OFF to ON inversion, whereas IpuA was most efficient at ON to OFF  
205 inversion (Figure 4B-C). These data demonstrate that all of the recombinases, including FimB,  
206 are capable of facilitating the inversion of *ipuS*, further validating the accuracy of the SVRE  
207 predictions.

208           It was previously demonstrated that the orientation of the *ipuS* switch can regulate  
209 expression of *ipuR* and *upaE* (34). It has also been hypothesized that IpuA may regulate  
210 expression of the D-serine utilization locus (37). To delineate the genes that are affected by *ipuS*  
211 inversion, RT-qPCR was used to quantify relative expression of several genes in CFT073 cells  
212 overexpressing IpuA or IpuB (Figure 4D). No significant change of expression was observed for  
213 *dsdC* or *dsdX*, indicating that neither IpuA, IpuB, nor the orientation of *ipuS* affect expression of  
214 the D-serine utilization locus. In contrast, expression of *ipuR* was increased by ~1600-fold with  
215 IpuB overexpression, and ~34-fold with IpuA overexpression (Figure 4D); this correlates with  
216 the orientation of the *ipuS* promoter switch. The significant increase in *upaE* expression was not  
217 as dramatic, ~33-fold with IpuB overexpression. Together, these data suggest that *ipuS* inversion  
218 only affects the expression of *ipuR* and *upaE* and clarifies that *dsdC* and *dsdX* transcription are  
219 not controlled by *ipuS*.

220

## 221 **Discussion**

222           The *fimS* switch is a well-studied example of epigenetic regulation by DNA inversion  
223 (29, 38, 39). A single bacterium can give rise to two populations which differ only in the  
224 orientation of the *fimS* switch, and individual bacteria can convert between these two  
225 populations. The inversion of this switch was first noted to be controlled by two linked  
226 recombinases, FimB and FimE (30); in general, *fimS* inversion is described as stochastic, though  
227 regulation of the recombinases and several other proteins which bind to regions in the *fimS*  
228 switch can influence the bias (15, 38). Therefore, Type 1 pilus expression exhibits phase  
229 variation (stochastic inversion) that is responsive to environmental conditions (regulation of  
230 bias). With the sequencing of the genomes of several UPEC strains, most notably CFT073 (40)

231 and UTI89 (41), genes encoding additional recombinases with homology to FimB and FimE  
232 were discovered (31, 32). These recombinases, like FimB and FimE, were found to regulate  
233 inversion of promoter elements genetically linked to the respective recombinase gene.  
234 Interestingly, these recombinases also have activity at *fimS*, providing potentially additional  
235 layers of regulation for Type 1 pilus expression (31, 32). Importantly, the inverted repeats for  
236 these known switches do not always share obvious sequence similarity (see below), implying  
237 that a simple search for similar inverted sequences in the genome is not a viable strategy for  
238 discovering other invertible switches. The discovery of these unlinked recombinases, therefore,  
239 raises several salient questions: (i) do the *fim*-linked FimB and FimE recombinases also have  
240 other inversion targets in the genome; (ii) what is the full suite of targets for all of the Fim  
241 recombinases; (iii) what is the consequence of coordinating inversion of multiple promoters with  
242 the same recombinases; (iv) are the other non-*fim* promoters important for Type 1 pilus  
243 expression or function; (v) what additional control of Type 1 pilus expression, if any, is gained  
244 by using an unlinked recombinase instead of or in addition to regulating FimB and FimE; (vi) is  
245 the regulation of the *fimS* switch important for the evolution or maintenance of the unlinked  
246 recombinases, particularly since they are not conserved in all *E. coli* (and thought to be on at  
247 least partially mobile elements). We have used whole genome sequencing, combined with  
248 overexpression of individual recombinases, to answer the first two of these questions. We found  
249 that the *fim* recombinases are very specific, and at least for CFT073 and UTI89, there are no  
250 other inversion targets for any of the recombinases aside from those already known. This  
251 therefore limits the complexity of questions (iii) and (iv) above, while further shedding light on  
252 question (vi) regarding the importance of Type 1 pili and its regulation in *E. coli*.

253 Positive verification of a new inversion locus is relatively straightforward once the locus  
254 is known, and two recent studies have used whole genome sequencing (with Illumina and PacBio  
255 data) to achieve accurate quantification of *fimS* inversion percentages under different conditions  
256 (42, 43). However, to truly establish the specificity of the *fim* recombinases, a strong negative  
257 predictive value is required when analyzing whole genome sequencing data (alternatively, a low  
258 noise level). With SVRE, we have improved the analysis of insert read lengths from paired-end  
259 short read sequencing data, leading to both sensitive and specific detection of inversions  
260 throughout the genome. The key analytical contribution of SVRE is to apply a theoretically  
261 optimal measure of differences in distributions (from an information theory perspective) that can  
262 then be related to the underlying structure of the genome. More explicitly, currently popular  
263 second-generation sequencing technology generates paired-end reads; the reads within each pair  
264 are separated by a certain distance, determined by the library preparation. Importantly, the  
265 distribution of distances should not depend on the DNA sequence itself (or location on the  
266 genome). Therefore, we can use a comparison of local versus global insert length distributions to  
267 identify when the genome structure does not match our expectation. This type of analysis is also  
268 referred to as anomaly detection, in which relative entropy is a commonly used technique (44).  
269 Many other SV detection programs use the same underlying idea, in which anomalous insert  
270 lengths are equated to variation in the genome structure, but they make the assumption that the  
271 read length distribution is normal (45, 46). Our use of relative entropy in SVRE therefore brings  
272 several key advantages: (i) generality to any distribution of insert lengths (which may change  
273 depending on how library preparation and size selection are done); (ii) elimination of parameters  
274 required to tune the program (such as specifying the expected mean and variance of the assumed  
275 normal distribution); (iii) utilization of information contained in “concordant” reads that are

276 within the bulk of the expected distribution (these are still used in the calculation of relative  
277 entropy); and (iv) removal of the need for a cutoff for number of “discordant” reads.

278         From a practical point of view, we find that SVRE produces generally low background  
279 signals for most of the genome, from which known SVs clearly stand out (Figure 2A and 2B,  
280 between 3.5-4.5 Mbp). To make an assessment of the value of using information theory to  
281 analyze read length distributions, we reanalyzed our sequencing data with five other commonly  
282 used programs including GASVPro (47), SVDetect (46), Pindel (48), breseq (49), and DELLY  
283 (45) (Figure S3). In general, DELLY showed the greatest agreement with SVRE, while  
284 GASVPro had the least overlap. Some of these algorithms, such as GASVPro and Pindel,  
285 produced many more predictions than SVRE, and required applying a cutoff to allele depth in  
286 order reduce the calls to a manageable number. A clear advantage of SVRE is that it enables a  
287 simple visualization of the relative entropy (Figures 2 and 3), in addition to providing a list of SV  
288 predictions. The connection between DNA structure and relative entropy provides a natural  
289 priority ranking for validation and study of individual SVs. Use of SVRE on UTI89 and CFT073  
290 thus allowed us to identify all previously known targets of the Fim recombinases as invertible  
291 sequences in the genome. We also identified several SVs that were unrelated to the Fim  
292 recombinases. Finally, the good signal-to-noise ratio provides confidence that under the  
293 conditions tested, we indeed found no additional invertible elements in the entire genome.

294         Among the previously identified inversion loci, we found that *ipuS* could be inverted by  
295 FimB, both in its native context in the CFT073 chromosome (Figure 3) and when the *ipuS* switch  
296 was inserted into a plasmid (Figure 4). In contrast, the original work identifying *ipuS* concluded  
297 that FimB was not capable of inverting *ipuS* (34). We did find that, of the five Fim recombinases,  
298 FimB inverted *ipuS* in either direction with the lowest efficiency (Figure 4B-C), making its

299 effects more difficult to detect. Combined with differences in the chosen promoters to drive  
300 FimB expression, this possibly accounts for the discrepancy between the two studies. Our results  
301 also confirm that *ipuS* orientation regulates expression of *ipuR* and *upaE*, while clarifying that  
302 the *dsd* operon is not regulated by *ipuS* (Figure 4D). Interestingly, FimE strongly drove inversion  
303 from OFF to ON in the MDS42 background (Figure 4B) but not in the CFT073 background  
304 (Figure 4C). Of note, while traditionally FimE was thought to only mediate inversion in the ON  
305 to OFF direction, FimE has been noted to mediate OFF to ON inversion in some conditions in  
306 different strains (42, 50). Therefore, these FimE results could be due to the allele of FimE or  
307 other strain-dependent differences.

308         It is remarkable that Type 1 pilus expression is regulated by five Fim recombinases that  
309 regulate little else. The convergence at *fimS* suggests a potentially intricate coordination to  
310 control Type 1 pili expression; presumably this facilitates optimal host colonization or adhesion  
311 in some other evolutionarily relevant environment. The genetic context for these recombinases  
312 may provide some hints as to how *fimS* regulation by both “core” and “accessory” recombinases  
313 has evolved. FimB and FimE are considered to be core recombinases since they are encoded  
314 adjacent to *fimS* and are present in nearly all *E. coli* strains (51). In contrast, the accessory  
315 recombinases FimX, IpuA, and IpuB are encoded at distal locations on two different  
316 pathogenicity islands. FimX is encoded adjacent to *hyxS*, while IpuA and IpuB are encoded  
317 adjacent to *ipuS*. Therefore, it seems likely that the original role of FimX was to regulate *hyxS*,  
318 while IpuA and IpuB originally regulated *ipuS*. We speculate that once UPEC acquired the  
319 pathogenicity islands housing these recombinases, the recombinases were co-opted to regulate  
320 *fimS* in addition to their cognate switch, and that this additional layer of regulation has given  
321 UPEC some sort of advantage. This idea is supported by the observation that *fimX* is enriched in

322 UPEC strains (83.2%) compared to commensals (36%) (51). However, *ipuA* and *ipuB* are found  
323 at low levels in roughly equal proportions among UPEC (23.7%) and commensals (15%) alike  
324 (51). How these three switches, whose IRs differ in length and sequence, could be regulated by  
325 multiple recombinases is still not clear and an area for further investigation. FimB and FimE  
326 have been shown to bind to *fimS* at the IRs at half sites that overlap and flank the IRs (52).  
327 Therefore, one would hypothesize that the IRs and their surrounding sequence would be quite  
328 similar. There is some alignment observed between *ipuS* and *fimS*, and *ipuS* and *hyxS* (34).  
329 However, the alignment between *fimS* and *hyxS* is poor, despite the fact that FimX is able to  
330 facilitate recombination at both switches (31-33). It thus remains an open question how the Fim  
331 recombinases recognize these IRs with apparently dissimilar sequences.

332         The fact that additional recombinases have been recruited to regulate *fimS* does imply  
333 that proper Type 1 pilus expression is important to the evolutionary success of UPEC. This  
334 notion is consistent with the observation of positive selection on the FimH adhesin, which results  
335 in tuning the conformational flexibility of the protein, leading to modulation of the dynamics of  
336 binding to the surface of bladder epithelial cells (53-57). Of note, proper regulation may in some  
337 cases include downregulation of Type 1 pili expression at appropriate times, which is also  
338 supported by the regulatory mutations seen in EHEC (to lock the *fimS* switch in the OFF  
339 orientation) (58), the widespread inactivation of *fimB* in the ST131 *E. coli* lineage via an  
340 insertion sequence (42), and the strong positive selection on *fimA* (thought to be due to immune  
341 evasion) (59). Downregulation may also explain the finding of low Type 1 pilus expression in  
342 bacteria in the urine of some human UTI patients (60-62), though variation in the interaction  
343 between different hosts and pathogens during infection is another possibility (63). Here, we have  
344 provided additional data that argue that Type 1 pili are important to the success of *E. coli*, and

345 particularly UPEC, suggesting that current efforts to target Type 1 pilus function to prevent and  
346 treat UTI represent a rational anti-virulence strategy.

347

## 348 **Materials and Methods**

### 349 *Bacterial strains*

350 All strains utilized in this study are listed in Table S1. Creation of knockout strains was  
351 done using lambda red recombination (64) with 50 bp flanking sequences as described before  
352 (65). Primers used for recombination are listed in Table S2.

353

### 354 *Preparation of sequencing data*

355 Overnight cultures were diluted 1:100 into LB broth containing chloramphenicol (20  
356 µg/mL) and were incubated with shaking at 25° C for 24 h, then diluted 1:1000 into fresh media  
357 supplemented with chloramphenicol and arabinose (0.5%) and incubated for another 24 h. After  
358 the 48 h growth period, genomic DNA was extracted and prepared for Illumina sequencing. For  
359 UTI89, the library was prepared using standard techniques including shearing, end-repair, size  
360 selection, PCR, and purification with AMPure XP beads; sequencing was performed on an  
361 Illumina HiSeq 2000 machine as paired reads with a length of 76 bps. The CFT073 libraries  
362 were made using the Illumina TruSeq DNA Library Prep Kit v2 and were sequenced on the  
363 Illumina MiSeq as paired reads of a length of 150 bps.

364

### 365 *Development of SVRE*

366 We developed SVRE to improve on existing strategies used in SV detection, particularly  
367 those which make use of insert length distributions. When mapped to a perfect reference (i.e. not



368 containing an SV), paired reads will map on opposite strands and at a distance determined by the  
369 insert size of the sequencing library, which is usually intentionally controlled during library  
370 preparation. Paired reads that map in this way are referred to as “concordant” pairs, while those  
371 that do not are “discordant”. One immediate strategy is to focus on discordant reads; clusters of  
372 discordant reads mapping to a particular region of the genome are then identified as a potential  
373 SV. However, distinguishing between these two classes is not always trivial, and appropriate  
374 cutoffs for how many discordant reads should be required to support a true SV are difficult to  
375 determine a priori. Programs such as GASVPro (47), SVDetect (46), DELLY (45),  
376 VariationHunter (66), BreakDancer (67), and the read distribution module of LUMPY (68)  
377 define concordant reads as those whose mapping distances fall within a chosen range based on  
378 the expected mapping distance and the standard deviation. In other words, library preparation is  
379 assumed to generate a roughly normal distribution of read insert lengths. Another drawback to  
380 this approach is that concordant reads are discarded and any information that concordant reads  
381 could supply for predicting SVs (such as differences in their length distribution) is lost.

382 Another strategy that avoids this concordant/discordant differentiation considers the  
383 overall distribution of mapping distances. By looking at histograms of mapping distances,  
384 changes from the expected distribution can be detected by a number of methods including  
385 statistical tests ( $X^2$ , K-S test, t-test, Z-test, etc.) or by using classification algorithms (such as  
386 support vector machines). Existing algorithms that utilize this distribution comparison strategy  
387 include SVM<sup>2</sup> (69) and MoDIL (70).

388 SVRE also uses a distribution comparison strategy. We choose the global insert length  
389 distribution as an empirical null model; implicitly, we are assuming that SVs are rare overall and  
390 therefore have a minimal global effect on the insert length distribution. We then compare the

391 distribution of a local window to this global distribution using relative entropy (Kullback-Leibler  
392 divergence, relative information content, or information divergence/gain). In information theory,  
393 relative entropy is a measure of the divergence between two “information” distributions (35).  
394 This is strongly related to concepts about signal encoding and compression, in which entropy is  
395 known to define an optimal theoretical lower limit for compressed or encoded message size.  
396 With respect to SV detection, to the extent that information is carried within insert length  
397 distributions, we suggest that relative entropy is a potentially optimal statistic for quantifying  
398 how different a local distribution is from the global null distribution, though we have not  
399 formally proven this.

400       Details about the implementation of SVRE can be found in the Supplemental  
401 Information. SVRE was written in Perl and is available for download at  
402 <https://github.com/swainechen/svre>.

403

#### 404 *Structural variation prediction with other software*

405       GASVPro version 1.2 (47), SVDetect version 0.8b (46), Pindel version 0.2.5b9 (48),  
406 breseq version 0.33.1 (49), and DELLY version 0.7.8 (45) were run according to the instructions  
407 provided by the developers. Fastq files were used as the input for breseq, whereas the other  
408 programs required sorted, paired-end bam files which were produced using BWA-MEM (71) and  
409 SAMtools (72). Any additional pre- and post-processing steps, as well as analysis of the output,  
410 were performed ad hoc with Python.

411

#### 412 *PCR to confirm structural variations*

413 The primers utilized to validate predicted SVs are listed in Table S2 and were designed  
414 according to the specific SV type as outlined in Fig S1A-C. PCR was performed with cells  
415 grown for 48 h at 25° C with passaging at 24 h and cells grown for 7 h at 37° C. The cells were  
416 grown in LB with arabinose to induce expression of recombinases. PCR was performed with  
417 cells from a freshly grown culture or with gDNA isolated from the culture.

418

#### 419 *Cloning*

420 The vectors pSLC-372 and pSLC-373 contain the *ipuS* switch in the OFF or ON position,  
421 respectively, cloned into the BamHI and SacI sites of pUC19. To obtain *ipuS* DNA in both  
422 orientations, *ipuS* was amplified from CFT073/pBAD-*ipuA* cells induced with arabinose.  
423 Plasmids encoding for Fim recombinases were made by amplifying the recombinase from the  
424 genomic DNA of either UTI89 or CFT073, and cloning it into the SacI and XbaI sites of  
425 pBAD33. The same FimB plasmid was used for both strains given that the *fimB* sequence is  
426 identical in the two genomes. These plasmids, along with the primers used for making them, are  
427 listed in Table S3.

428

#### 429 *Quantification of ipuS orientation*

430 Overnight cultures were diluted 1:100 into 2 mL of LB supplemented with  
431 chloramphenicol (20 µg/mL) and arabinose (0.5%) and grown shaking for 7 h at 37° C. A PCR  
432 was then performed to amplify across the *ipuS* switch using primers *cwr175* and *cwr178* to  
433 amplify from the genome, or primers M13F and M13R to amplify from the plasmids pSLC-372  
434 and pSLC-373 (Table S2). The resulting product was digested with PacI, which has only one site  
435 in the PCR product that is located within *ipuS*. This digestion reaction results in two bands that

436 differ in size depending on the orientation of the switch. The digest reactions were run on a 2%  
437 gel, imaged, and the densities of one OFF orientation band and one ON orientation band were  
438 quantified using ImageJ FIJI. The total density of the two bands was set to 100% and the percent  
439 of ON versus OFF was then calculated.

440

#### 441 *RT-qPCR*

442 Overnight cultures of CFT073 carrying pBAD33, pBAD-ipuA, or pBAD-ipuB, were  
443 subcultured 1:100 into 10 mL of LB with chloramphenicol (20  $\mu\text{g/mL}$ ) in a 100 mL flask and  
444 were grown with shaking for 3 h at 37° C. Arabinose was then added to a final concentration of  
445 0.5%, and the cells were allowed to incubate for another hour, at which point 0.5 mL of culture  
446 was added to 1 mL of RNAprotect Bacteria Reagent and the cells were lysed using proteinase K  
447 and lysozyme. RNA was isolated using the RNeasy Mini Kit, and DNA was removed with  
448 DNase I digestion. The SuperScript II RT kit was used to make cDNA. For each sample, a  
449 control reaction was run that lacked reverse transcriptase to check for DNA contamination  
450 during the qPCR reactions.

451 Primers employed in the qPCR reaction are listed in Table S2. A control lacking cDNA  
452 was included for each pair of primers, in addition to the reactions with and without reverse  
453 transcriptase for each sample. The KAPA SYBR FAST qPCR Master Mix was used along with  
454 0.5  $\mu\text{M}$  of each primer and ROX Low. The reactions were run on the ViiA 7 Real-Time PCR  
455 System with the following program: 95° C for 3 minutes followed by 40 cycles of 95° C for 3  
456 seconds and 60° C for 20 seconds. The data were analyzed using the  $\Delta\Delta\text{C}_t$  method with 16S  
457 acting as a reference gene and the pBAD33 sample as the reference sample. Differences between  
458 sample  $\Delta\text{C}_t$  values were tested using an unpaired, two-tailed T test.

459

## 460 **Acknowledgments**

461 This work was supported by the National Research Foundation, Singapore (NRF-RF2010-10 to  
462 S.L.C.); the National Medical Research Council, Ministry of Health, Singapore grant numbers  
463 NMRC/CIRG/1357/2013, NMRC/CIRG/1358/2013, and NMRC/OFIRG/0009/2016; and the  
464 Genome Institute of Singapore (GIS) / Agency for Science, Technology, and Research  
465 (A\*STAR). Experiments were performed by CWR, LTL, BP, SR, and CYC. The SVRE  
466 algorithm was developed by RS and SLC. The manuscript was written by CWR, RS, BP, and  
467 SLC.

468

## 469 **References**

- 470 1. Foxman B. 2014. Urinary tract infection syndromes: occurrence, recurrence,  
471 bacteriology, risk factors, and disease burden. *Infect Dis Clin North Am* 28:1-13.
- 472 2. Flores-Mireles AL, Walker JN, Caparon M, Hultgren SJ. 2015. Urinary tract infections:  
473 epidemiology, mechanisms of infection and treatment options. *Nat Rev Microbiol*  
474 13:269-84.
- 475 3. Foxman B, Barlow R, D'Arcy H, Gillespie B, Sobel JD. 2000. Urinary tract infection:  
476 self-reported incidence and associated costs. *Ann Epidemiol* 10:509-15.
- 477 4. Smith AL, Brown J, Wyman JF, Berry A, Newman DK, Stapleton AE. 2018. Treatment  
478 and Prevention of Recurrent Lower Urinary Tract Infections in Women: A Rapid Review  
479 with Practice Recommendations. *J Urol* doi:10.1016/j.juro.2018.04.088.

- 480 5. Aabenhus R, Hansen MP, Siersma V, Bjerrum L. 2017. Clinical indications for antibiotic  
481 use in Danish general practice: results from a nationwide electronic prescription database.  
482 *Scand J Prim Health Care* 35:162-169.
- 483 6. Rautakorpi UM, Klaukka T, Honkanen P, Makela M, Nikkarinen T, Palva E, Roine R,  
484 Sarkkinen H, Huovinen P, Group MCS. 2001. Antibiotic use by indication: a basis for  
485 active antibiotic policy in the community. *Scand J Infect Dis* 33:920-6.
- 486 7. Foxman B. 2010. The epidemiology of urinary tract infection. *Nat Rev Urol* 7:653-60.
- 487 8. Nielubowicz GR, Mobley HL. 2010. Host-pathogen interactions in urinary tract infection.  
488 *Nat Rev Urol* 7:430-41.
- 489 9. Bergsten G, Wullt B, Svanborg C. 2005. Escherichia coli, fimbriae, bacterial persistence  
490 and host response induction in the human urinary tract. *Int J Med Microbiol* 295:487-502.
- 491 10. Carey AJ, Tan CK, Ipe DS, Sullivan MJ, Cripps AW, Schembri MA, Ulett GC. 2016.  
492 Urinary tract infection of mice to model human disease: Practicalities, implications and  
493 limitations. *Crit Rev Microbiol* 42:780-99.
- 494 11. Ulett GC, Totsika M, Schaale K, Carey AJ, Sweet MJ, Schembri MA. 2013.  
495 Uropathogenic Escherichia coli virulence and innate immune responses during urinary  
496 tract infection. *Curr Opin Microbiol* 16:100-7.
- 497 12. Bahrani-Mougeot FK, Buckles EL, Lockatell CV, Hebel JR, Johnson DE, Tang CM,  
498 Donnenberg MS. 2002. Type 1 fimbriae and extracellular polysaccharides are preeminent  
499 uropathogenic Escherichia coli virulence determinants in the murine urinary tract. *Mol*  
500 *Microbiol* 45:1079-93.

- 501 13. Connell I, Agace W, Klemm P, Schembri M, Marild S, Svanborg C. 1996. Type 1  
502 fimbrial expression enhances *Escherichia coli* virulence for the urinary tract. *Proc Natl*  
503 *Acad Sci U S A* 93:9827-32.
- 504 14. Hultgren SJ, Porter TN, Schaeffer AJ, Duncan JL. 1985. Role of type 1 pili and effects of  
505 phase variation on lower urinary tract infections produced by *Escherichia coli*. *Infect*  
506 *Immun* 50:370-7.
- 507 15. Russell CW, Mulvey MA. 2014. Type 1 and P Pili of Uropathogenic *Escherichia coli*, p  
508 49-70. *In* Barocchi MA, Telford JL (ed), *Bacterial Pili: Structure, Synthesis and Role in*  
509 *Disease*. CAB International, London, UK.
- 510 16. Klemm P, Jorgensen BJ, van Die I, de Ree H, Bergmans H. 1985. The fim genes  
511 responsible for synthesis of type 1 fimbriae in *Escherichia coli*, cloning and genetic  
512 organization. *Mol Gen Genet* 199:410-4.
- 513 17. Krogfelt KA, Bergmans H, Klemm P. 1990. Direct evidence that the FimH protein is the  
514 mannose-specific adhesin of *Escherichia coli* type 1 fimbriae. *Infect Immun* 58:1995-8.
- 515 18. Zhou G, Mo WJ, Sebbel P, Min G, Neubert TA, Glockshuber R, Wu XR, Sun TT, Kong  
516 XP. 2001. Uroplakin Ia is the urothelial receptor for uropathogenic *Escherichia coli*:  
517 evidence from in vitro FimH binding. *J Cell Sci* 114:4095-103.
- 518 19. Eto DS, Jones TA, Sundsbak JL, Mulvey MA. 2007. Integrin-mediated host cell invasion  
519 by type 1-piliated uropathogenic *Escherichia coli*. *PLoS Pathog* 3:e100.
- 520 20. Anderson GG, Palermo JJ, Schilling JD, Roth R, Heuser J, Hultgren SJ. 2003.  
521 Intracellular bacterial biofilm-like pods in urinary tract infections. *Science* 301:105-7.

- 522 21. Mulvey MA, Lopez-Boado YS, Wilson CL, Roth R, Parks WC, Heuser J, Hultgren SJ.  
523 1998. Induction and evasion of host defenses by type 1-piliated uropathogenic  
524 *Escherichia coli*. *Science* 282:1494-7.
- 525 22. Martinez JJ, Mulvey MA, Schilling JD, Pinkner JS, Hultgren SJ. 2000. Type 1 pilus-  
526 mediated bacterial invasion of bladder epithelial cells. *EMBO J* 19:2803-12.
- 527 23. Wright KJ, Seed PC, Hultgren SJ. 2007. Development of intracellular bacterial  
528 communities of uropathogenic *Escherichia coli* depends on type 1 pili. *Cell Microbiol*  
529 9:2230-41.
- 530 24. Mulvey MA, Schilling JD, Hultgren SJ. 2001. Establishment of a persistent *Escherichia*  
531 *coli* reservoir during the acute phase of a bladder infection. *Infect Immun* 69:4572-9.
- 532 25. Justice SS, Hung C, Theriot JA, Fletcher DA, Anderson GG, Footer MJ, Hultgren SJ.  
533 2004. Differentiation and developmental pathways of uropathogenic *Escherichia coli* in  
534 urinary tract pathogenesis. *Proc Natl Acad Sci U S A* 101:1333-8.
- 535 26. Spaulding CN, Klein RD, Schreiber HLt, Janetka JW, Hultgren SJ. 2018. Precision  
536 antimicrobial therapeutics: the path of least resistance? *NPJ Biofilms Microbiomes* 4:4.
- 537 27. Mydock-McGrane LK, Hannan TJ, Janetka JW. 2017. Rational design strategies for  
538 FimH antagonists: new drugs on the horizon for urinary tract infection and Crohn's  
539 disease. *Expert Opin Drug Discov* 12:711-731.
- 540 28. Olsen PB, Klemm P. 1994. Localization of promoters in the *fim* gene cluster and the  
541 effect of H-NS on the transcription of *fimB* and *fimE*. *FEMS Microbiol Lett* 116:95-100.
- 542 29. Abraham JM, Freitag CS, Clements JR, Eisenstein BI. 1985. An invertible element of  
543 DNA controls phase variation of type 1 fimbriae of *Escherichia coli*. *Proc Natl Acad Sci*  
544 *U S A* 82:5724-7.



- 545 30. Klemm P. 1986. Two regulatory fim genes, fimB and fimE, control the phase variation of  
546 type 1 fimbriae in *Escherichia coli*. *EMBO J* 5:1389-93.
- 547 31. Bryan A, Roesch P, Davis L, Moritz R, Pellett S, Welch RA. 2006. Regulation of type 1  
548 fimbriae by unlinked FimB- and FimE-like recombinases in uropathogenic *Escherichia*  
549 *coli* strain CFT073. *Infect Immun* 74:1072-83.
- 550 32. Xie Y, Yao Y, Kolisnychenko V, Teng CH, Kim KS. 2006. HbiF regulates type 1  
551 fimbriation independently of FimB and FimE. *Infect Immun* 74:4039-47.
- 552 33. Bateman SL, Seed PC. 2012. Epigenetic regulation of the nitrosative stress response and  
553 intracellular macrophage survival by extraintestinal pathogenic *Escherichia coli*. *Mol*  
554 *Microbiol* 83:908-25.
- 555 34. Battaglioli EJ, Goh KGK, Atruksang TS, Schwartz K, Schembri MA, Welch RA. 2018.  
556 Identification and Characterization of a Phase-Variable Element That Regulates the  
557 Autotransporter UpaE in Uropathogenic *Escherichia coli*. *MBio* 9.
- 558 35. Kullback S, Leibler RA. 1951. On Information and Sufficiency. *The Annals of*  
559 *Mathematical Statistics* 22:79-86.
- 560 36. Stern B, Kamp D. 1989. Evolution of the DNA invertase Gin of phage Mu and related  
561 site-specific recombination proteins. *Protein Seq Data Anal* 2:87-91.
- 562 37. Anfora AT, Haugen BJ, Roesch P, Redford P, Welch RA. 2007. Roles of serine  
563 accumulation and catabolism in the colonization of the murine urinary tract by  
564 *Escherichia coli* CFT073. *Infect Immun* 75:5298-304.
- 565 38. Schwan WR. 2011. Regulation of fim genes in uropathogenic *Escherichia coli*. *World J*  
566 *Clin Infect Dis* 1:17-25.

- 567 39. Schembri MA, Ussery DW, Workman C, Hasman H, Klemm P. 2002. DNA microarray  
568 analysis of fim mutations in Escherichia coli. *Mol Genet Genomics* 267:721-9.
- 569 40. Welch RA, Burland V, Plunkett G, 3rd, Redford P, Roesch P, Rasko D, Buckles EL, Liou  
570 SR, Boutin A, Hackett J, Stroud D, Mayhew GF, Rose DJ, Zhou S, Schwartz DC, Perna  
571 NT, Mobley HL, Donnenberg MS, Blattner FR. 2002. Extensive mosaic structure  
572 revealed by the complete genome sequence of uropathogenic Escherichia coli. *Proc Natl*  
573 *Acad Sci U S A* 99:17020-4.
- 574 41. Chen SL, Hung CS, Xu J, Reigstad CS, Magrini V, Sabo A, Blasiar D, Bieri T, Meyer  
575 RR, Ozersky P, Armstrong JR, Fulton RS, Latreille JP, Spieth J, Hooton TM, Mardis ER,  
576 Hultgren SJ, Gordon JI. 2006. Identification of genes subject to positive selection in  
577 uropathogenic strains of Escherichia coli: a comparative genomics approach. *Proc Natl*  
578 *Acad Sci U S A* 103:5977-82.
- 579 42. Sarkar S, Roberts LW, Phan MD, Tan L, Lo AW, Peters KM, Paterson DL, Upton M,  
580 Ulett GC, Beatson SA, Totsika M, Schembri MA. 2016. Comprehensive analysis of type  
581 1 fimbriae regulation in fimB-null strains from the multidrug resistant Escherichia coli  
582 ST131 clone. *Mol Microbiol* 101:1069-87.
- 583 43. Zhang H, Susanto TT, Wan Y, Chen SL. 2016. Comprehensive mutagenesis of the fimS  
584 promoter regulatory switch reveals novel regulation of type 1 pili in uropathogenic  
585 Escherichia coli. *Proc Natl Acad Sci U S A* 113:4182-7.
- 586 44. Oluwasanya PW. 2017. Anomaly Detection: Review and preliminary Entropy method  
587 tests. arXiv:170808813.

- 588 45. Rausch T, Zichner T, Schlattl A, Stutz AM, Benes V, Korbel JO. 2012. DELLY:  
589 structural variant discovery by integrated paired-end and split-read analysis.  
590 *Bioinformatics* 28:i333-i339.
- 591 46. Zeitouni B, Boeva V, Janoueix-Lerosey I, Loeillet S, Legoix-ne P, Nicolas A, Delattre O,  
592 Barillot E. 2010. SVDetect: a tool to identify genomic structural variations from paired-  
593 end and mate-pair sequencing data. *Bioinformatics* 26:1895-6.
- 594 47. Sindi SS, Onal S, Peng LC, Wu HT, Raphael BJ. 2012. An integrative probabilistic  
595 model for identification of structural variation in sequencing data. *Genome Biol* 13:R22.
- 596 48. Ye K, Guo L, Yang X, Lamijer EW, Raine K, Ning Z. 2018. Split-Read Indel and  
597 Structural Variant Calling Using PINDEL. *Methods Mol Biol* 1833:95-105.
- 598 49. Deatherage DE, Barrick JE. 2014. Identification of mutations in laboratory-evolved  
599 microbes from next-generation sequencing data using breseq. *Methods Mol Biol*  
600 1151:165-88.
- 601 50. Stentebjerg-Olesen B, Chakraborty T, Klemm P. 2000. FimE-catalyzed off-to-on  
602 inversion of the type 1 fimbrial phase switch and insertion sequence recruitment in an  
603 *Escherichia coli* K-12 fimB strain. *FEMS Microbiol Lett* 182:319-25.
- 604 51. Bateman SL, Stapleton AE, Stamm WE, Hooton TM, Seed PC. 2013. The type 1 pili  
605 regulator gene fimX and pathogenicity island PAI-X as molecular markers of  
606 uropathogenic *Escherichia coli*. *Microbiology* 159:1606-17.
- 607 52. Gally DL, Leathart J, Blomfield IC. 1996. Interaction of FimB and FimE with the fim  
608 switch that controls the phase variation of type 1 fimbriae in *Escherichia coli* K-12. *Mol*  
609 *Microbiol* 21:725-38.

- 610 53. Sokurenko EV, Chesnokova V, Dykhuizen DE, Ofek I, Wu XR, Krogfelt KA, Struve C,  
611 Schembri MA, Hasty DL. 1998. Pathogenic adaptation of *Escherichia coli* by natural  
612 variation of the FimH adhesin. *Proc Natl Acad Sci U S A* 95:8922-6.
- 613 54. Weissman SJ, Beskhlebnaya V, Chesnokova V, Chattopadhyay S, Stamm WE, Hooton  
614 TM, Sokurenko EV. 2007. Differential stability and trade-off effects of pathoadaptive  
615 mutations in the *Escherichia coli* FimH adhesin. *Infect Immun* 75:3548-55.
- 616 55. Chen SL, Hung CS, Pinkner JS, Walker JN, Cusumano CK, Li Z, Bouckaert J, Gordon  
617 JI, Hultgren SJ. 2009. Positive selection identifies an *in vivo* role for FimH during  
618 urinary tract infection in addition to mannose binding. *Proc Natl Acad Sci U S A*  
619 106:22439-44.
- 620 56. Schwartz DJ, Kalas V, Pinkner JS, Chen SL, Spaulding CN, Dodson KW, Hultgren SJ.  
621 2013. Positively selected FimH residues enhance virulence during urinary tract infection  
622 by altering FimH conformation. *Proc Natl Acad Sci U S A* 110:15530-7.
- 623 57. Kalas V, Pinkner JS, Hannan TJ, Hibbing ME, Dodson KW, Holehouse AS, Zhang H,  
624 Tolia NH, Gross ML, Pappu RV, Janetka J, Hultgren SJ. 2017. Evolutionary fine-tuning  
625 of conformational ensembles in FimH during host-pathogen interactions. *Sci Adv*  
626 3:e1601944.
- 627 58. Roe AJ, Currie C, Smith DG, Gally DL. 2001. Analysis of type 1 fimbriae expression in  
628 verotoxigenic *Escherichia coli*: a comparison between serotypes O157 and O26.  
629 *Microbiology* 147:145-52.
- 630 59. Boyd EF, Hartl DL. 1998. Diversifying selection governs sequence polymorphism in the  
631 major adhesin proteins fimA, papA, and sfaA of *Escherichia coli*. *J Mol Evol* 47:258-67.

- 632 60. Hagan EC, Lloyd AL, Rasko DA, Faerber GJ, Mobley HL. 2010. Escherichia coli global  
633 gene expression in urine from women with urinary tract infection. PLoS Pathog  
634 6:e1001187.
- 635 61. Subashchandrabose S, Hazen TH, Brumbaugh AR, Himpsl SD, Smith SN, Ernst RD,  
636 Rasko DA, Mobley HL. 2014. Host-specific induction of Escherichia coli fitness genes  
637 during human urinary tract infection. Proc Natl Acad Sci U S A 111:18327-32.
- 638 62. Bielecki P, Muthukumarasamy U, Eckweiler D, Bielecka A, Pohl S, Schanz A, Niemeyer  
639 U, Oumeraci T, von Neuhoff N, Ghigo JM, Haussler S. 2014. In vivo mRNA profiling of  
640 uropathogenic Escherichia coli from diverse phylogroups reveals common and group-  
641 specific gene expression profiles. MBio 5:e01075-14.
- 642 63. Schreiber HLt, Conover MS, Chou WC, Hibbing ME, Manson AL, Dodson KW, Hannan  
643 TJ, Roberts PL, Stapleton AE, Hooton TM, Livny J, Earl AM, Hultgren SJ. 2017.  
644 Bacterial virulence phenotypes of Escherichia coli and host susceptibility determine risk  
645 for urinary tract infections. Sci Transl Med 9.
- 646 64. Datsenko KA, Wanner BL. 2000. One-step inactivation of chromosomal genes in  
647 Escherichia coli K-12 using PCR products. Proc Natl Acad Sci U S A 97:6640-5.
- 648 65. Khetrapal V, Mehershahi K, Rafee S, Chen S, Lim CL, Chen SL. 2015. A set of powerful  
649 negative selection systems for unmodified Enterobacteriaceae. Nucleic Acids Res 43:e83.
- 650 66. Hormozdiari F, Hajirasouliha I, Dao P, Hach F, Yorukoglu D, Alkan C, Eichler EE,  
651 Sahinalp SC. 2010. Next-generation VariationHunter: combinatorial algorithms for  
652 transposon insertion discovery. Bioinformatics 26:i350-7.
- 653 67. Chen K, Wallis JW, McLellan MD, Larson DE, Kalicki JM, Pohl CS, McGrath SD,  
654 Wendl MC, Zhang Q, Locke DP, Shi X, Fulton RS, Ley TJ, Wilson RK, Ding L, Mardis

- 655 ER. 2009. BreakDancer: an algorithm for high-resolution mapping of genomic structural  
656 variation. *Nat Methods* 6:677-81.
- 657 68. Layer RM, Chiang C, Quinlan AR, Hall IM. 2014. LUMPY: a probabilistic framework  
658 for structural variant discovery. *Genome Biol* 15:R84.
- 659 69. Chiara M, Pesole G, Horner DS. 2012. SVM(2): an improved paired-end-based tool for  
660 the detection of small genomic structural variations using high-throughput single-genome  
661 resequencing data. *Nucleic Acids Res* 40:e145.
- 662 70. Lee S, Hormozdiari F, Alkan C, Brudno M. 2009. MoDIL: detecting small indels from  
663 clone-end sequencing with mixtures of distributions. *Nat Methods* 6:473-4.
- 664 71. Li H. 2013. Aligning sequence reads, clone sequences and assembly contigs with BWA-  
665 MEM. arXiv:13033997v2.
- 666 72. Li H, Handsaker B, Wysoker A, Fennell T, Ruan J, Homer N, Marth G, Abecasis G,  
667 Durbin R, Genome Project Data Processing S. 2009. The Sequence Alignment/Map  
668 format and SAMtools. *Bioinformatics* 25:2078-9.

669

## 670 **Figure Legends**

671 **Figure 1. Detection of the *fimS* inversion by the SVRE algorithm.** (A) A schematic of how  
672 inversions are detected by SVRE. In the right experimental conditions, invertible elements are  
673 present in both orientations (shaded gray and orange). After library preparation and sequencing,  
674 paired reads derived from sequence in the reference orientation will map to opposite strands of  
675 the reference genome with the expected mapping distance. In contrast, paired reads derived from  
676 inverted sequences will map to the same strand of the reference genome, resulting in a negative  
677 mapping distance, which may also be of an unexpected magnitude. (B) UTI89 carrying a plasmid

678 encoding an arabinose-inducible *fimB* or *fimX* gene was sequenced and analyzed using SVRE.  
679 Mapping distance distributions are displayed for windows associated with *fimS* and determined  
680 by SVRE to have a significant distribution deviation, windows flanking *fimS*, and the global  
681 distribution.

682

683 **Figure 2. Detection of known and novel structural variations by SVRE in UTI89**

684 **overexpressing recombinases.** UTI89 cells carrying a plasmid encoding an arabinose-inducible  
685 *fimB* (A) or *fimX* (B) gene were sequenced and analyzed using SVRE as in Figure 1. Relative  
686 information criterion (RIC) scores are graphed for all windows on the UTI89 chromosome and  
687 the pUTI89 plasmid. Peaks are labeled according to the SV they represent as described in the  
688 text.

689

690 **Figure 3. Detection of structural variations using SVRE in CFT073 overexpressing**

691 **recombinases.** Relative information criterion (RIC) scores for all windows on the CFT073  
692 chromosome for (A) cells carrying the pBAD33 control plasmid, or cells overexpressing (B)  
693 *fimB*, (C) *fimE*, (D) *ipuA*, (E) *ipuB*, and (F) *fimX*. Significant peaks are labeled according to the  
694 SV they represent as described in the text.

695

696 **Figure 4. The *ipuS* switch can be inverted by any of the Fim recombinases to drive**

697 **expression of *ipuR* and *upaE*.** (A) A schematic of the genomic location of the *ipuS* invertible  
698 element, with *ipuS* outlined in orange, and the 7 bp IRs highlighted in blue. The breakpoints  
699 were determined by cloning the invertible element and surrounding sequence from  
700 CFT073/pBAD-*ipuA* induced with arabinose, followed by Sanger sequencing. (B)

701 Quantification of *ipuS* orientation in MDS42 carrying pSLC-372, which contains *ipuS* in the  
702 OFF orientation, or pSLC-373, which contains *ipuS* in the ON orientation. The cells also carry a  
703 plasmid encoding one of the recombinases or an empty vector control (“EV”). Orientation was  
704 quantified via PCR to amplify across the switch, followed by PacI digestion, and measurement of  
705 band density using ImageJ. (C) The orientation of the *ipuS* switch was quantified as in B in WT  
706 CFT073 with induced expression of different recombinases (“EV” is the empty vector control).  
707 (D) CFT073 carrying pBAD33, pBAD-fimE, or pBAD-fimX were induced with arabinose and  
708 RT-qPCR was performed to quantify relative gene expression. Gene expression was normalized  
709 to 16S levels, and the expression levels are expressed relative to the pBAD33 control samples.  
710 The  $\Delta C_t$  values of each condition were compared to that of the pBAD33 sample using an  
711 unpaired, two-tailed T test. \*  $P < 0.05$ , \*\*  $P < 0.01$ , \*\*\*  $P < 0.001$ . For figures B-D, bars indicate  
712 the mean with error bars representing the standard error of the mean.

713

## 714 **Supplemental**

715 **Figure S1. Confirmation of novel structural variations in UTI89.** A PCR strategy was  
716 employed that was specific to each SV type. (A) For inversions, two sets of primers were used.  
717 One set produces a band when the invertible element is in the orientation found on the reference  
718 genome. In contrast, the other set produces a band if there is an inversion event. (B) Deletions  
719 were detected by using distant primer sets that only produce a band if the intervening sequence is  
720 deleted, bringing the priming sites closer together. (C) Duplications were detected using outward  
721 facing primer pairs that produce a band only if a tandem duplication event occurs. (D-I) For each  
722 SV, the leftmost coordinate of significant windows called by SVRE are represented by red  
723 (UTI89/pBAD-fimB) and blue (UTI89/pBAD-fimE) lines. The primers used to confirm the



724 predicted SVs are depicted on the schematic of the neighboring genes, and the gels that resulted  
725 from the use of those primers are shown below. (D-F) Confirmation of inversions at (D) 0.9 Mb,  
726 (E) 2.1 Mb, and (F) 2.9 Mb were performed in UTI89 (“Ctrl”), UTI89/pBAD33 (“EV”), and  
727 UTI89/pBAD-*fimX* (“*fimX*”) cells. The linked phage invertase *pin* is highlighted in (A). (G-I)  
728 Confirmation of (G) a prophage deletion at 1.6 Mb, prophage duplication and deletions at (H) 1.2  
729 Mb and (I) 5.0 Mb. The PCR was performed using WT UTI89 as well as  
730 UTI89 $\Delta$ *fimB* $\Delta$ *fimE* $\Delta$ *fimX* (“ $\Delta$ BEX”).

731

732 **Figure S2. Confirmation of novel structural variations in CFT073.** For each SV, the leftmost  
733 coordinate of significant windows called by SVRE are represented by red (pBAD-*fimB*), black  
734 (pBAD-*fimE*), orange (pBAD-*ipuA*), green (pBAD-*ipuB*), and blue (pBAD-*fimX*) lines. The  
735 primers used to confirm the predicted SVs are depicted on the schematic of the neighboring  
736 genes, and the gels that resulted from the use of those primers are shown below. Confirmation of  
737 the SVs was performed in CFT073 carrying either pBAD33 (“EV”) or plasmids encoding the  
738 various recombinases. (A) Detection of duplication and deletion of phage at 0.9 Mb and (B) a  
739 phage at 1.3 Mb.

740

741 **Figure S3. Comparison of SVRE calls to that of other SV prediction programs. SV**  
742 predictions for (A) UTI89 and (B) CFT073 are listed in the first columns of each table. Whether  
743 that SV was detected in a given sample by a program is indicated by a filled box following the  
744 color code indicated in the legend.

745

746 **Table S1. Strains utilized in this work.** The table lists the strains used in this work. If the strain  
747 was part of a previous publication, the appropriate reference is given.

748

749 **Table S2. Primers used for strain creation, SV validation, and qRT-PCR.** The table lists  
750 primer sets used to detect SVs, create knockout mutant strains, and measure gene expression.

751

752 **Table S3. Plasmids utilized in this work.** For each plasmid that was used in this work, either a  
753 reference is given or the primers that were used in the creation of the plasmid are listed.

754

755 **Supplemental Information. Implementation of SVRE.** A description of how the SVRE  
756 program is implemented, including how relative entropy is calculated.

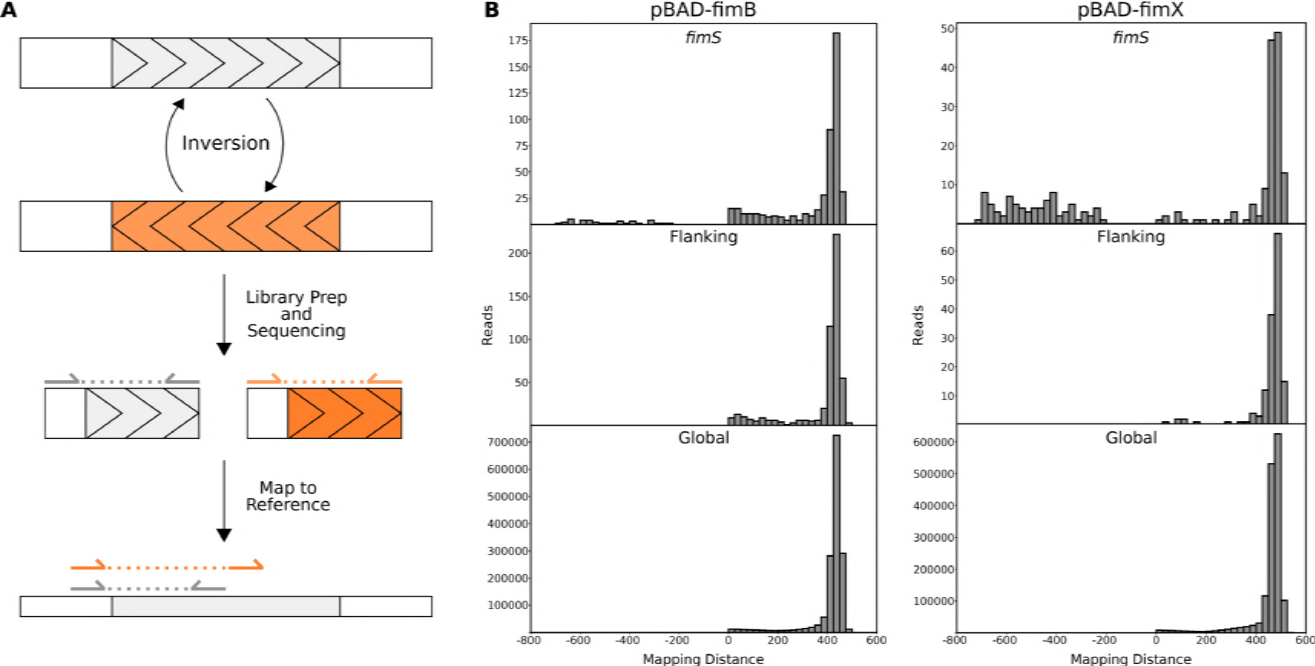

**Figure 1. Detection of the *fimS* inversion by the SVRE algorithm.** (A) A schematic of how inversions are detected by SVRE. In the right experimental conditions, invertible elements are present in both orientations (shaded gray and orange). After library preparation and sequencing, paired reads derived from sequence in the reference orientation will map to opposite strands of the reference genome with the expected mapping distance. In contrast, paired reads derived from inverted sequences will map to the same strand of the reference genome, resulting in a negative mapping distance, which may also be of an unexpected magnitude. (B) UT189 carrying a plasmid encoding an arabinose-inducible *fimB* or *fimX* gene was sequenced and analyzed using SVRE. Mapping distance distributions are displayed for windows associated with *fimS* and determined by SVRE to have a significant distribution deviation, windows flanking *fimS*, and the global distribution.

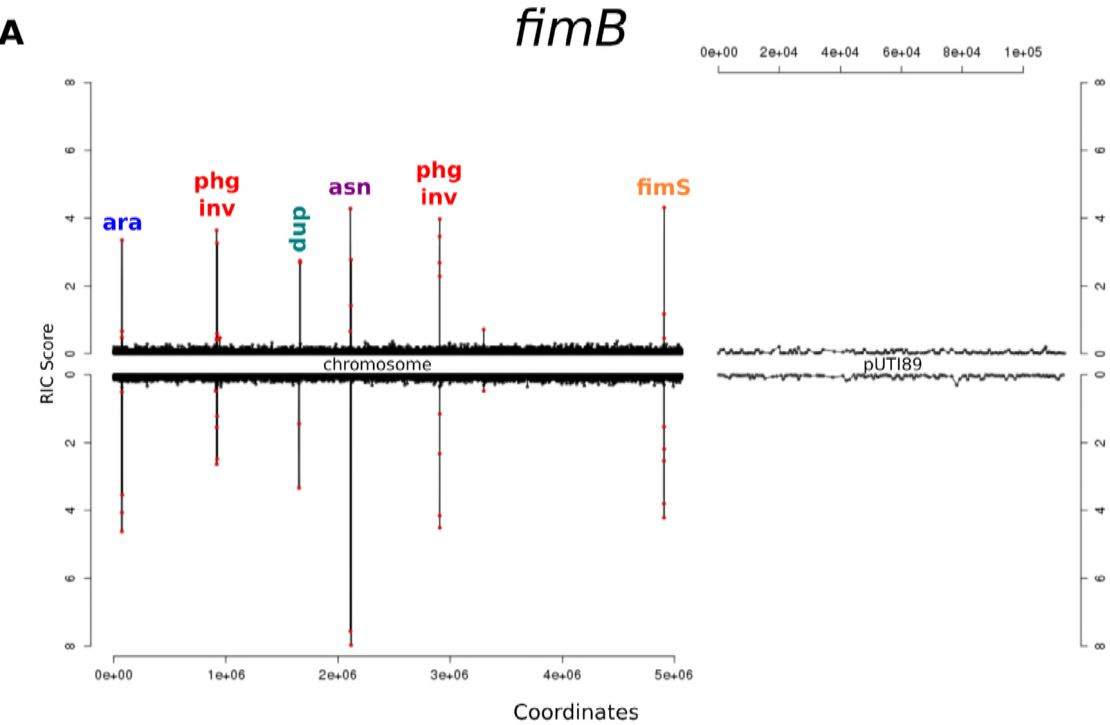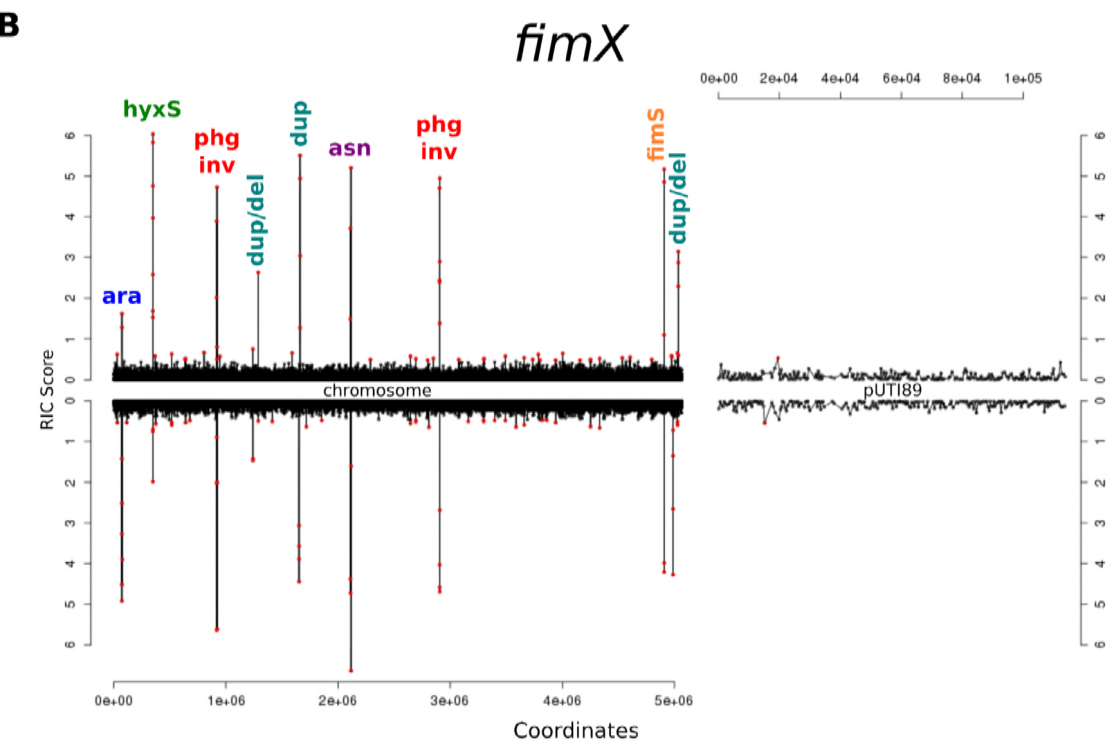

**Figure 2. Detection of known and novel structural variations by SVRE in UTI89 overexpressing recombinases.** UTI89 cells carrying a plasmid encoding an arabinose-inducible *fimB* (A) or *fimX* (B) gene were sequenced and analyzed using SVRE as in Figure 1. Relative information criterion (RIC) scores are graphed for all windows on the UTI89 chromosome and the pUTI89 plasmid. Peaks are labeled according to the SV they represent as described in the text.

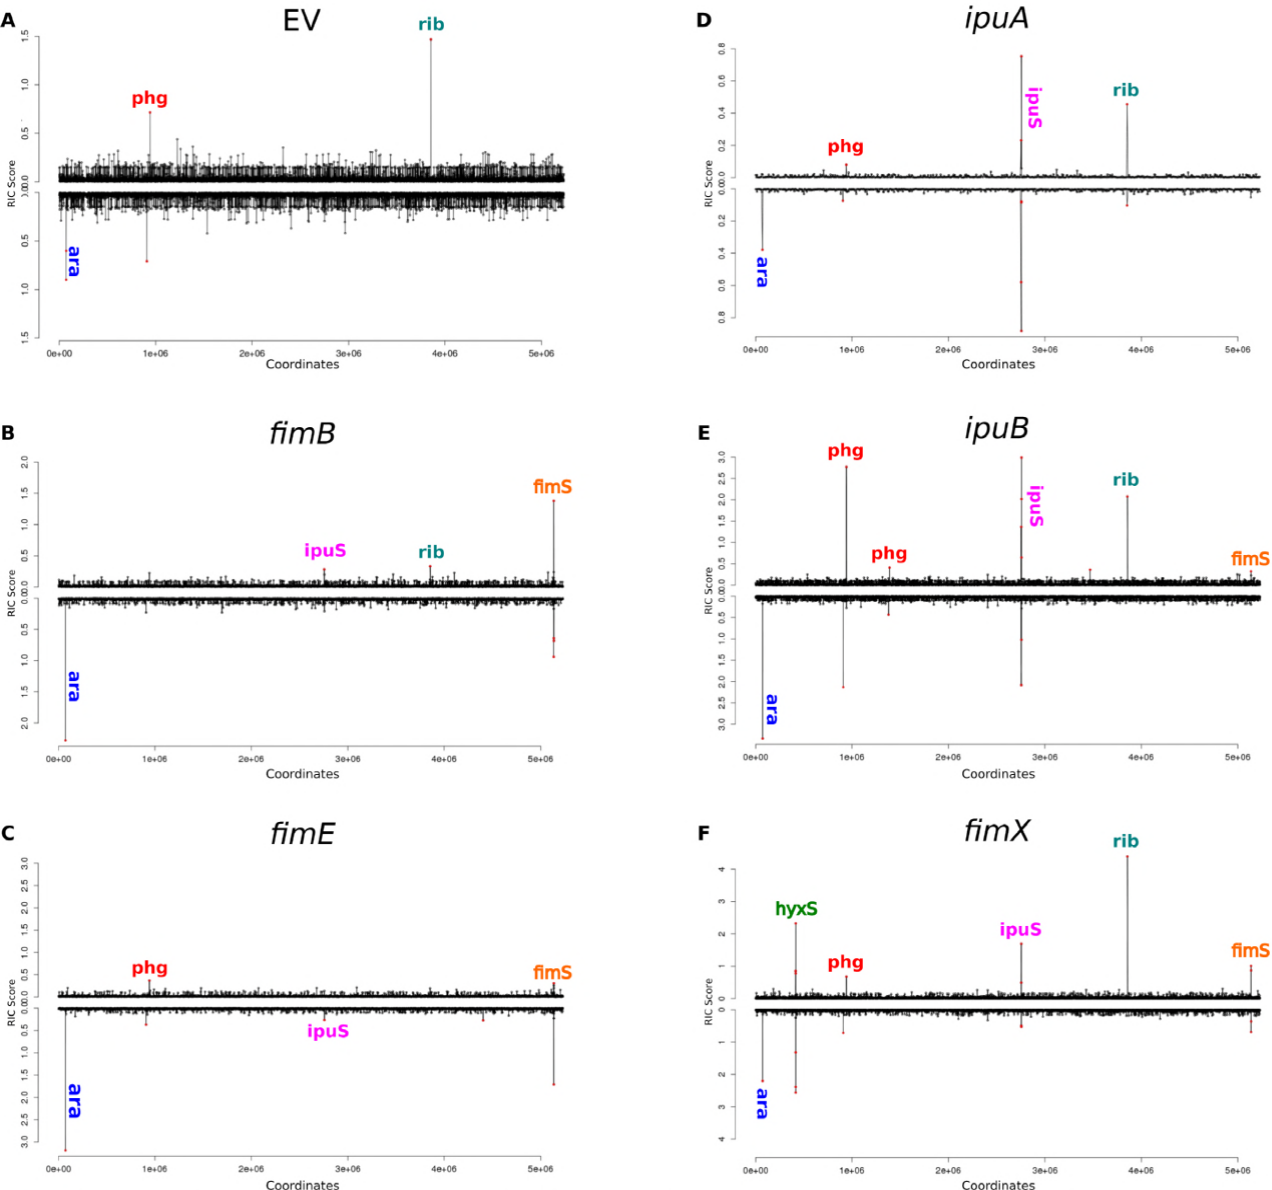

**Figure 3. Detection of structural variations using SVRE in CFT073 overexpressing recombinases.** Relative information criterion (RIC) scores for all windows on the CFT073 chromosome for (A) cells carrying the pBAD33 control plasmid, or cells overexpressing (B) *fimB*, (C) *fimE*, (D) *ipuA*, (E) *ipuB*, and (F) *fimX*. Significant peaks are labeled according to the SV they represent as described in the text.

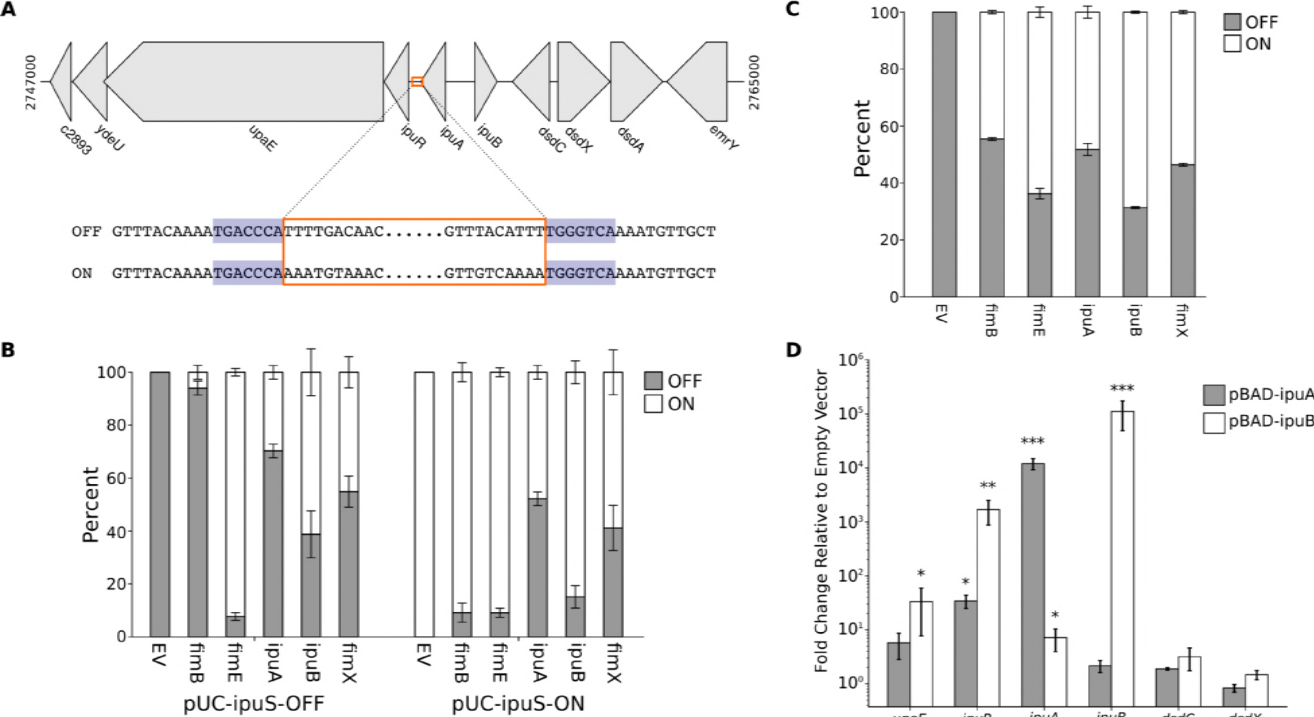

**Figure 4. The *ipuS* switch can be inverted by any of the Fim recombinases to drive expression of *ipuR* and *upaE*.** (A) A schematic of the genomic location of the *ipuS* invertible element, with *ipuS* outlined in orange, and the 7 bp IRs highlighted in blue. The breakpoints were determined by cloning the invertible element and surrounding sequence from CFT073/pBAD-*ipuA* induced with arabinose, followed by Sanger sequencing. (B) Quantification of *ipuS* orientation in MDS42 carrying pSLC-372, which contains *ipuS* in the OFF orientation, or pSLC-373, which contains *ipuS* in the ON orientation. The cells also carry a plasmid encoding one of the recombinases or an empty vector control ("EV"). Orientation was quantified via PCR to amplify across the switch, followed by *PacI* digestion, and measurement of band density using ImageJ. (C) The orientation of the *ipuS* switch was quantified as in B in WT CFT073 with induced expression of different recombinases ("EV" is the empty vector control). (D) CFT073 carrying pBAD33, pBAD-*ipuA*, or pBAD-*ipuB* were induced with arabinose and RT-qPCR was performed to quantify relative gene expression. Gene expression was normalized to 16S levels, and the expression levels are expressed relative to the pBAD33 control samples. The  $\Delta\Delta C_t$  values of each condition were compared to that of the pBAD33 sample using an unpaired, two-tailed T test. \*  $P < 0.05$ , \*\*  $P < 0.01$ , \*\*\*  $P < 0.001$ . For figures B-D, bars indicate the mean with error bars representing the standard error of the mean.
